# Supplementary material
Source: PubMed Central journal article supplement (PMC3131489)
Supplement: NIHMS272698-supplement-01.pdf [file NIHMS272698-supplement-01.pdf]

**Supplementary Table 1: Results of integrative screening approach**

| Name                                                                                              | U133 Probe Set | Location | CGH loss % | MedianTumor Expression vs Nevi | Aza Treatment Fold Upregulation | CpG |
|---------------------------------------------------------------------------------------------------|----------------|----------|------------|--------------------------------|---------------------------------|-----|
| Ankyrin 3, Node Of Ranvier (Ankyrin G)                                                            | 206385_s_at    | 10q21    | -26.4      | 0.03                           | 1.80                            | N   |
| Aquaporin 3                                                                                       | 39248_at       | 9p13     | -20.8      | 0.01                           | 1.55                            | Y   |
| Gap Junction Protein, Alpha 1, 43Kda (Connexin 43)                                                | 201667_at      | 6q21     | -21.7      | 0.05                           | 1.50                            | N   |
| Interleukin 18 (Interferon-Gamma-Inducing Factor)                                                 | 206295_at      | 11q22    | -17.0      | 0.15                           | 1.92                            | N   |
| Chordin-Like 1                                                                                    | 209763_at      | Xq23     | -13.2      | 0.15                           | 1.70                            | Y   |
| Secreted Frizzled-Related Protein 1                                                               | 202036_s_at    | 8p12     | -12.3      | 0.17                           | 1.72                            | Y   |
| Cystatin A (Stefin A)                                                                             | 204971_at      | 3q21     | -17.9      | 0.01                           | 1.31                            | N   |
| Caspase Recruitment Domain Family, Member 15                                                      | 220066_at      | 16p12    | -6.6       | 0.11                           | 1.32                            | N   |
| Transmembrane Protein 47                                                                          | 209656_s_at    | Xp11     | -13.5      | 0.08                           | 1.29                            | Y   |
| Swi/Snf Related, Matrix Associated, Actin Dependent Regulator Of Chromatin, Subfamily A, Member 1 | 215294_s_at    | Xq25     | -14.2      | 0.26                           | 1.51                            | Y   |
| Collagen, Type Vii, Alpha 1 (Epidermolysis Bullosa, Dystrophic Dominant And Recessive)            | 204136_at      | 3p21     | -18.9      | 0.21                           | 1.38                            | Y   |
| Transcription Factor 8 (Represses Interleukin 2 Expression)                                       | 210875_s_at    | 10p11    | -20.8      | 0.33                           | 1.85                            | Y   |
| Keratin 17                                                                                        | 205157_s_at    | 17q12    | -7.5       | 0.02                           | 1.24                            | N   |
| Chloride Intracellular Channel 2                                                                  | 213415_at      | Xq28     | -14.2      | 0.18                           | 1.27                            | N   |
| Mitogen-Activated Protein Kinase Kinase Kinase 5                                                  | 203836_s_at    | 6q22     | -23.2      | 0.36                           | 1.55                            | Y   |
| Mannosidase, Alpha, Class 1A, Member 1                                                            | 221760_at      | 6q22     | -23.2      | 0.29                           | 1.34                            | Y   |
| Pleckstrin And Sec7 Domain Containing 3                                                           | 203355_s_at    | 8p12     | -12.3      | 0.17                           | 1.26                            | N   |
| Trophoblast-Derived Noncoding Rna                                                                 | 214657_s_at    | 11q13    | -15.1      | 0.36                           | 1.54                            | NC  |
| Cd44 Antigen (Homing Function And Indian Blood Group System)                                      | 217523_at      | 11p13    | -13.2      | 0.40                           | 1.92                            | Y   |
| Serine (Or Cysteine) Proteinase Inhibitor, Clade F (Alpha-2)                                      | 202283_at      | 17p13    | -12.3      | 0.38                           | 1.57                            | N   |
| Antiplasmin, Pigment Epithelium Derived Factor, Member 1                                          | 218810_at      | 1p34     | -12.6      | 0.22                           | 1.28                            | Y   |
| Mcp-1 Treatment-Induced Protein                                                                   | 208798_x_at    | 15q11    | -11.3      | 0.18                           | 1.24                            | N   |
| Golgin-67                                                                                         | 204048_s_at    | 6q24     | -26.4      | 0.38                           | 1.48                            | Y   |
| Phosphatase And Actin Regulator 2                                                                 | 220247_at      | 15q14    | -11.3      | 0.26                           | 1.24                            | Y   |
| Cancer Susceptibility Candidate 5                                                                 | 218854_at      | 6q22     | -23.2      | 0.44                           | 1.58                            | Y   |
| Squamous Cell Carcinoma Antigen Recognized By T Cells 2                                           | 203548_s_at    | 8p22     | -13.2      | 0.32                           | 1.28                            | Y   |
| Lipoprotein Lipase                                                                                | 206392_s_at    | 3q25     | -19.8      | 0.46                           | 1.74                            | Y   |
| Retinoic Acid Receptor Responder (Tazarotene Induced) 1                                           | 202565_s_at    | 10p11    | -20.8      | 0.34                           | 1.29                            | Y   |
| Supervillin                                                                                       | 215990_s_at    | 3q27     | -17.9      | 0.40                           | 1.34                            | N   |
| B-Cell CII/Lymphoma 6 (Zinc Finger Protein 51)                                                    | 212196_at      | 5q11     | -5.7       | 0.48                           | 1.88                            | Y   |
| Interleukin 6 Signal Transducer (Gp130, Oncostatin M Receptor)                                    | 207121_s_at    | 15q21    | -11.3      | 0.45                           | 1.42                            | Y   |
| Mitogen-Activated Protein Kinase 6                                                                | 218951_s_at    | Xp22     | -16.0      | 0.41                           | 1.32                            | Y   |
| Phosphatidylinositol-Specific Phospholipase C, X Domain Containing 1                              | 201211_s_at    | Xp11     | -13.5      | 0.31                           | 1.24                            | Y   |
| Dead (Asp-Glu-Ala-Asp) Box Polypeptide 3, X-Linked                                                | 204661_at      | 1p36     | -11.3      | 0.36                           | 1.26                            | N   |
| Cd52 Antigen (Campath-1 Antigen) // Cd52 Antigen (Campath-1 Antigen)                              | 201829_at      | 10p15    | -19.8      | 0.31                           | 1.23                            | Y   |
| Neuroepithelial Cell Transforming Gene 1                                                          | 219049_at      | 8p21     | -13.2      | 0.41                           | 1.28                            | N   |
| Chondroitin Beta1,4 N-Acetylgalactosaminyltransferase                                             | 202379_s_at    | 3p23     | -17.9      | 0.49                           | 1.44                            | Y   |
| Natural Killer-Tumor Recognition Sequence                                                         | 203910_at      | 1p22     | -11.3      | 0.44                           | 1.30                            | Y   |
| Ptp11-Associated Rhogap 1                                                                         | 218005_at      | 10q11    | -24.5      | 0.43                           | 1.29                            | Y   |
| Zinc Finger Protein 22 (Kox 15)                                                                   | 210148_at      | 11p13    | -13.2      | 0.37                           | 1.24                            | Y   |
| Homeodomain Interacting Protein Kinase 3                                                          | 63305_at       |          | -19.8      | 0.37                           | 1.24                            | N   |
| Pbx/Knotted 1 Homeobox 2                                                                          | 206580_s_at    | 11q13    | -15.1      | 0.50                           | 1.39                            | Y   |
| Egf-Containing Fibulin-Like Extracellular Matrix Protein 2                                        | 218603_at      | 6q23     | -24.5      | 0.48                           | 1.33                            | Y   |
| Headcase Homolog (Drosophila)                                                                     | 203386_at      | 13q22    | -18.9      | 0.50                           | 1.37                            | Y   |
| Tbc1 Domain Family, Member 4                                                                      | 212665_at      | 3q25     | -19.8      | 0.49                           | 1.35                            | Y   |
| Tcdd-Inducible Poly(Adp-Ribose) Polymerase                                                        | 210809_s_at    | 13q13    | -16.0      | 0.55                           | 1.93                            | N   |
| Periostin, Osteoblast Specific Factor                                                             | 212538_at      | 13q32    | -15.1      | 0.51                           | 1.37                            | Y   |
| Dedicator Of Cytokinesis 9                                                                        |                |          |            |                                |                                 |     |
